# Supplementary material
Source: Springer Nature journal article supplement (https://www.springermedizin.de/resource/supplementary/13054_2010_8822_MOESM4_ESM.pdf/9732650)

**GEDV<sub>2</sub> (ml)**

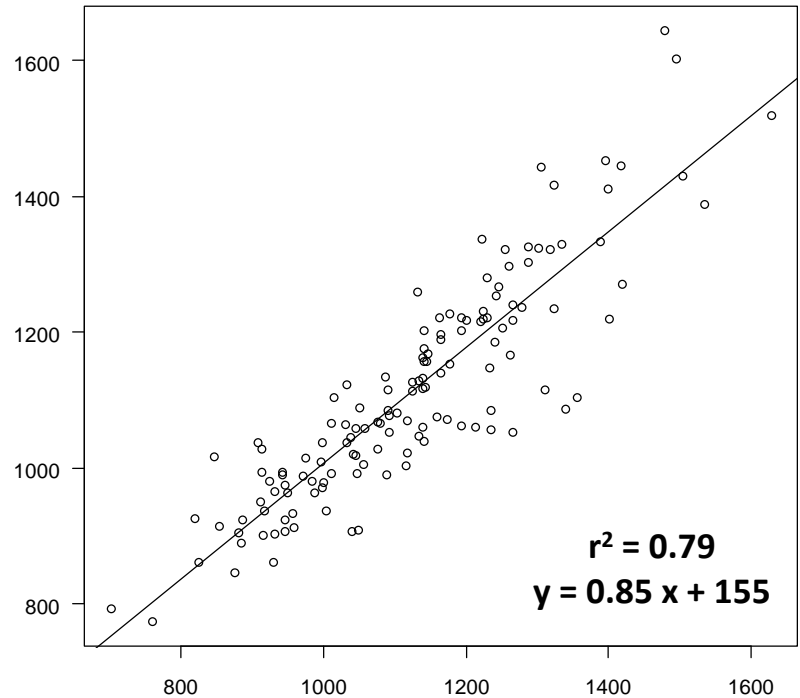

**GEDV<sub>1</sub> (ml)**

**GEDV<sub>2</sub> - GEDV<sub>1</sub> (ml)**

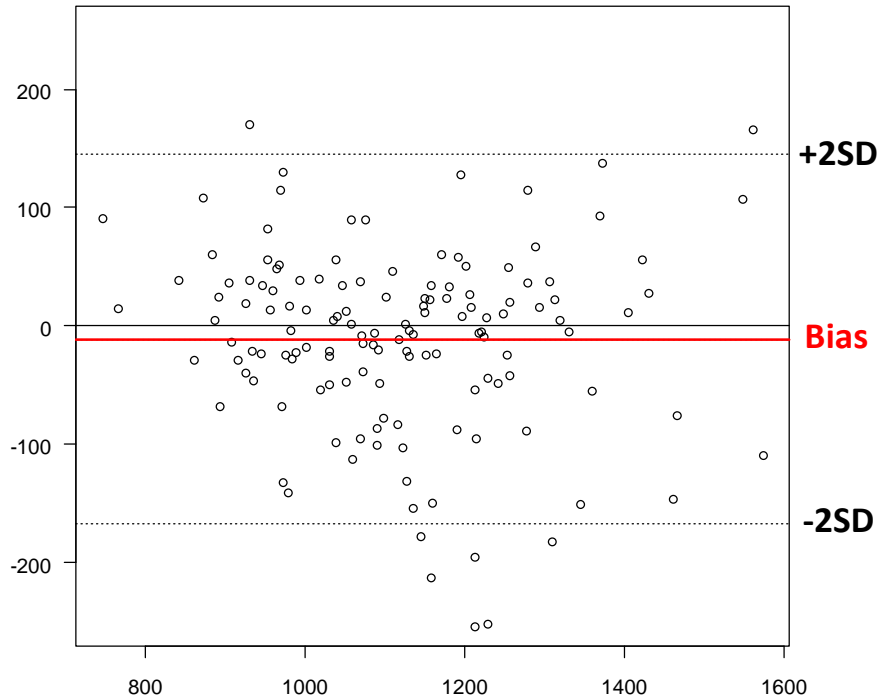

**Average GEDV<sub>1</sub> & GEDV<sub>2</sub> (ml)**

Supplement: MOESM4 [file 9732650]
